# Supplementary material for: Indole Alkaloids from Fischerella Inhibit Vertebrate Development in the Zebrafish (Danio rerio) Embryo Model
Source: MDPI journal article supplement (doi:10.3390/toxins6123568), 2014-12-22

## Supplementary Information

**Table S1.** NMR Spectroscopic Data (400 MHz, C<sub>6</sub>D<sub>6</sub>) for 12-epi-hapalindole H isonitrile (**1**).

| Position     | $\delta_C$ , mult.     | $\delta_H$ mult. (J in Hz) | COSY         | HMBC           |
|--------------|------------------------|----------------------------|--------------|----------------|
| <b>1</b>     | -                      | 6.75 s                     | -            | 9              |
| <b>2</b>     | 119.3, CH              | 7.55 dd (1.8,2)            | -            | -              |
| <b>3</b>     | 114, C                 | -                          | -            | -              |
| <b>4</b>     | 141.4, C               | -                          | -            | 6, 17, 18      |
| <b>5</b>     | 113.6, CH              | 7.05 d (7.3)               | 6            | 6, 7, 16       |
| <b>6</b>     | 123.7, CH              | 7.26 dd (7.3, 8)           | 5, 7         | 4              |
| <b>7</b>     | 109.2, CH              | 6.96 d (8)                 | 6            | 5, 9           |
| <b>8</b>     | 134.6, C               | -                          | -            | -              |
| <b>9</b>     | 126.4, C               | -                          | -            | 7              |
| <b>10 ax</b> | 36.9, CH               | 3.09 dd (10.7, 10.7)       | 11 ax, 15 ax | -              |
| <b>11 ax</b> | 66.2, CH               | 3.21 br d (10.7)           | 10 ax        | 19             |
| <b>12</b>    | 41.2, C                | -                          | -            | 19, 21         |
| <b>13 ax</b> | 36.6, CH <sub>2</sub>  | 0.97 m                     | 14           | 19             |
| <b>13 eq</b> | 36.6, CH <sub>2</sub>  | 1.33 m                     | 14           | 19             |
| <b>14 ax</b> | 21.2, CH <sub>2</sub>  | 1.15 m                     | 13, 15ax     | -              |
| <b>14 eq</b> | 21.2, CH <sub>2</sub>  | 1.33 m                     | 13, 15ax     | -              |
| <b>15 ax</b> | 50.2, CH               | 1.03 m (2.8, 10.7)         | 10 ax, 14    | 17, 18         |
| <b>16</b>    | 37.9, C                | -                          | -            | 5, 17, 18      |
| <b>17</b>    | 25.3, CH <sub>3</sub>  | 0.96 s                     | -            | 4, 15, 16      |
| <b>18</b>    | 25.5, CH <sub>3</sub>  | 1.28 s                     | -            | 4, 15, 16      |
| <b>19</b>    | 17.6, CH <sub>3</sub>  | 1.10 s                     | -            | 11, 12, 13, 20 |
| <b>20</b>    | 146.5, CH              | 5.73 dd (10.8, 17.4)       | 21E, 21Z     | 19, 21         |
| <b>21 E</b>  | 114.2, CH <sub>2</sub> | 5.08 dd (0.8, 17.4)        | 20, 21 Z     | 12,20          |
| <b>21 Z</b>  | 114.2, CH <sub>2</sub> | 5.06 dd (0.8, 10.8)        | 20, 21 E     | 12,20          |
| <b>23</b>    | n.d.                   | -                          | -            | -              |

**Figure S1.** Sequence data (16S rDNA) from *Fischerella* 52-1.

**File name: CYA1 – CYA106F.seq**

**Primer #1: CYA106F**

**Primer sequence: CGGACGGGTGAGTAACGCGTGA**

**Amplified sequence 591 bp**

```
CTGGAACGGTGGCTAATACCGGATGTGCCGAGAGGTGAAAGGTTAACTGCCTGGAGATGAGCTCGCGT
CTGATTAGCTAGTTGGTGGTGTAAAGGACTACCAAGGCGACGATCAGTAGCTGGTCTGAGAGGATGATCA
GCCACACTGGAAGTGAACACCGGTCCAGACTCCTACGGGAGGCAGCAGTGGGGAATTTCCGCAATGGGC
GAAAGCCTGACGGAGCAATACCGCGTGAGGGAGGAAGGCTCTTGGGTTGTAAACCTCTTTCTCAGGGAA
TAAGCAAGTGAAGGTACCTGAGGAATCAGCATCGGCTAACTCCGTGCCAGCAGCCGCGTAATACGGAGG
ATGCAAGCGTTATCCGGAATGATTGGGCGTAAAGCGTCCGTAGGTAGCAGTGTGTCTATTGTAAAGA
GTTTGGCTTAACCAAATAAGGGCGGTAGAACTACACAGCTAGAGTGCCTTCGGGGCAGAGGGAATTCCT
GGTGTAGCGGTGAAATGCGTAGAGATCAGGAAGAACACCGGTGGCGAAAGCGCTCTGCTAGGCCGCAACT
GACACTGAGGGACGAAAGCTAGGGGAGCGAATG
```

**File name: CYA9 – CYA359.seq**

**Primer #2: CYA359F**

**Primer sequence: GGGGAATYTTCCGCAATGGG**

**Amplified sequence 368 bp**

```
CCGCGTGAGGGAGGAGGCTCTTGGGTTGTAAACCTCTTTCTCAGGGAATAAGCAAGTGAAGGTACCT
GAGGAATCAGCATCGGCTAACTCCGTGCCAGCAGCCGCGTAATACGGAGGATGCAAGCGTTATCCGGAA
TGATTGGGCGTAAAGCGTCCGTAGGTAGCAGTGTGTCTATTGTAAAGAGTTTGGCTTAACCAAATAA
GGGCGGTAGAACTACACAGCTAGAGTGCCTTCGGGGCAGAGGGAATTCCTGGTGTAGCGGTGAAATGCG
TAGAGATCAGGAAGAACACCGGTGGCGAAAGCGCTCTGCTAGGCCGCAACTGACACTGAGGGACGAAAGC
TAGGGGAGCGAATGGGATTA
```

**Figure S2.** HPLC comparison of active fractions from extracts of *Fischerella* 52-1 extracellular material (a); culture medium (b); and biomass (c). Detection at 220 nm, a characteristic  $\lambda_{\text{max}}$  for indole alkaloids from *Fischerella* and the Stigonemataceae.

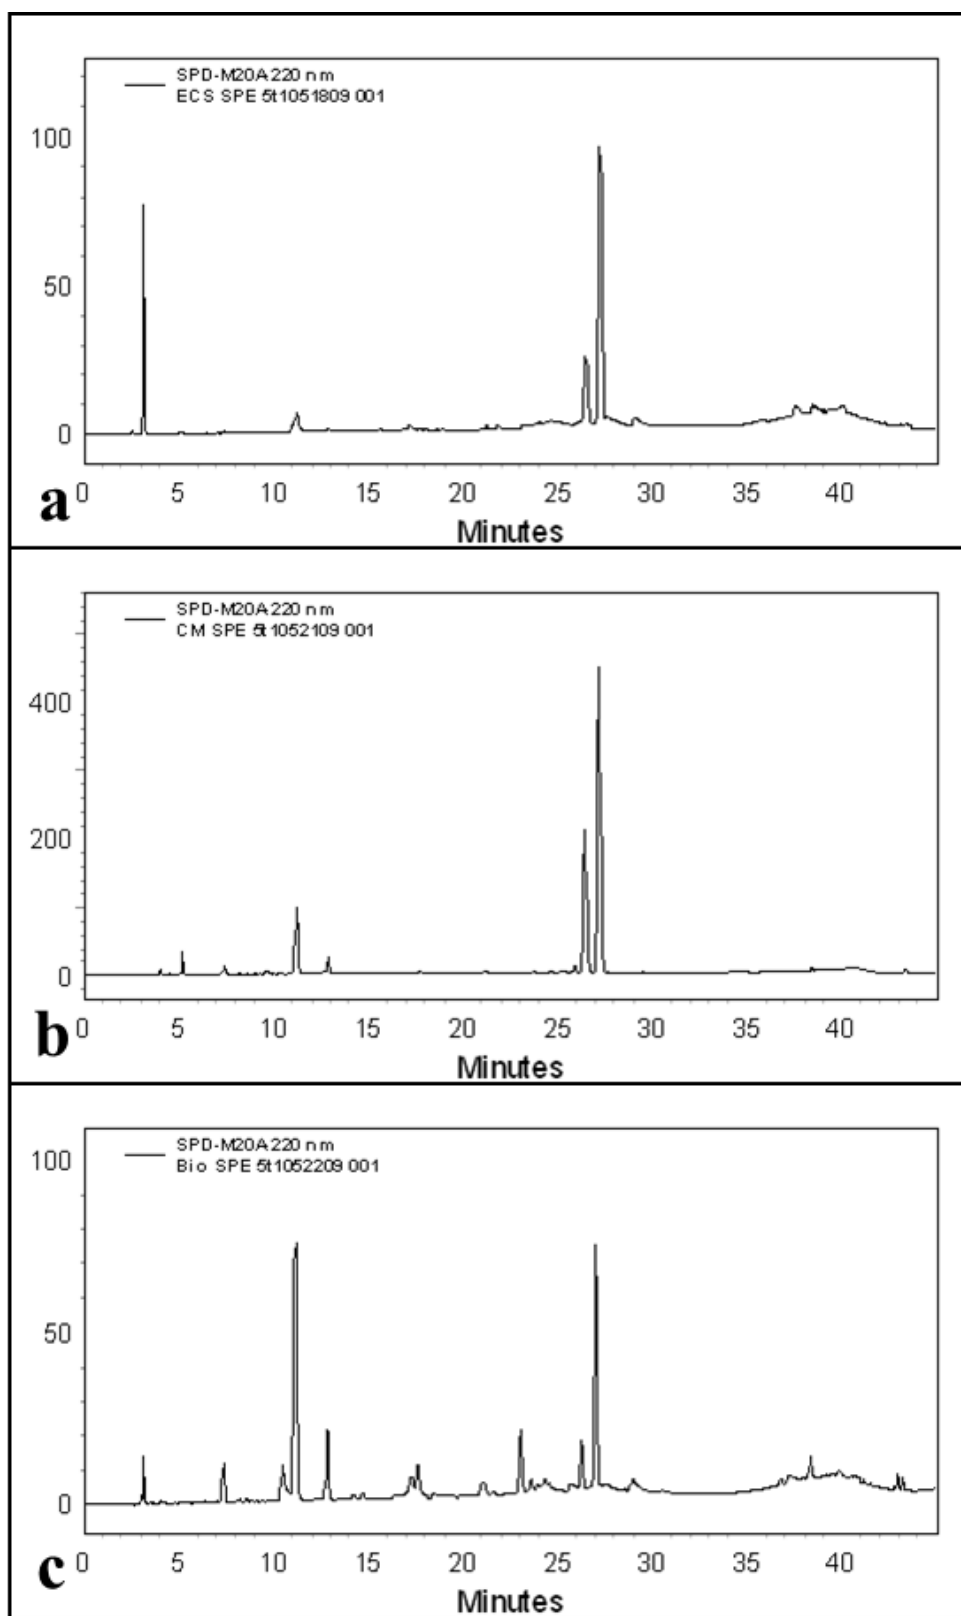

**Figure S3.** Typical UV spectrum of indole alkaloids, and chromatogram of bioactive HPLC fraction showing components with matching UV absorbance/spectra. Peaks 7 and 8 correspond to compounds **1** and **2** isolated in the present study. Only peaks 3, 7 and 8 showed any significant bioactivity (when tested at equivalent concentrations).

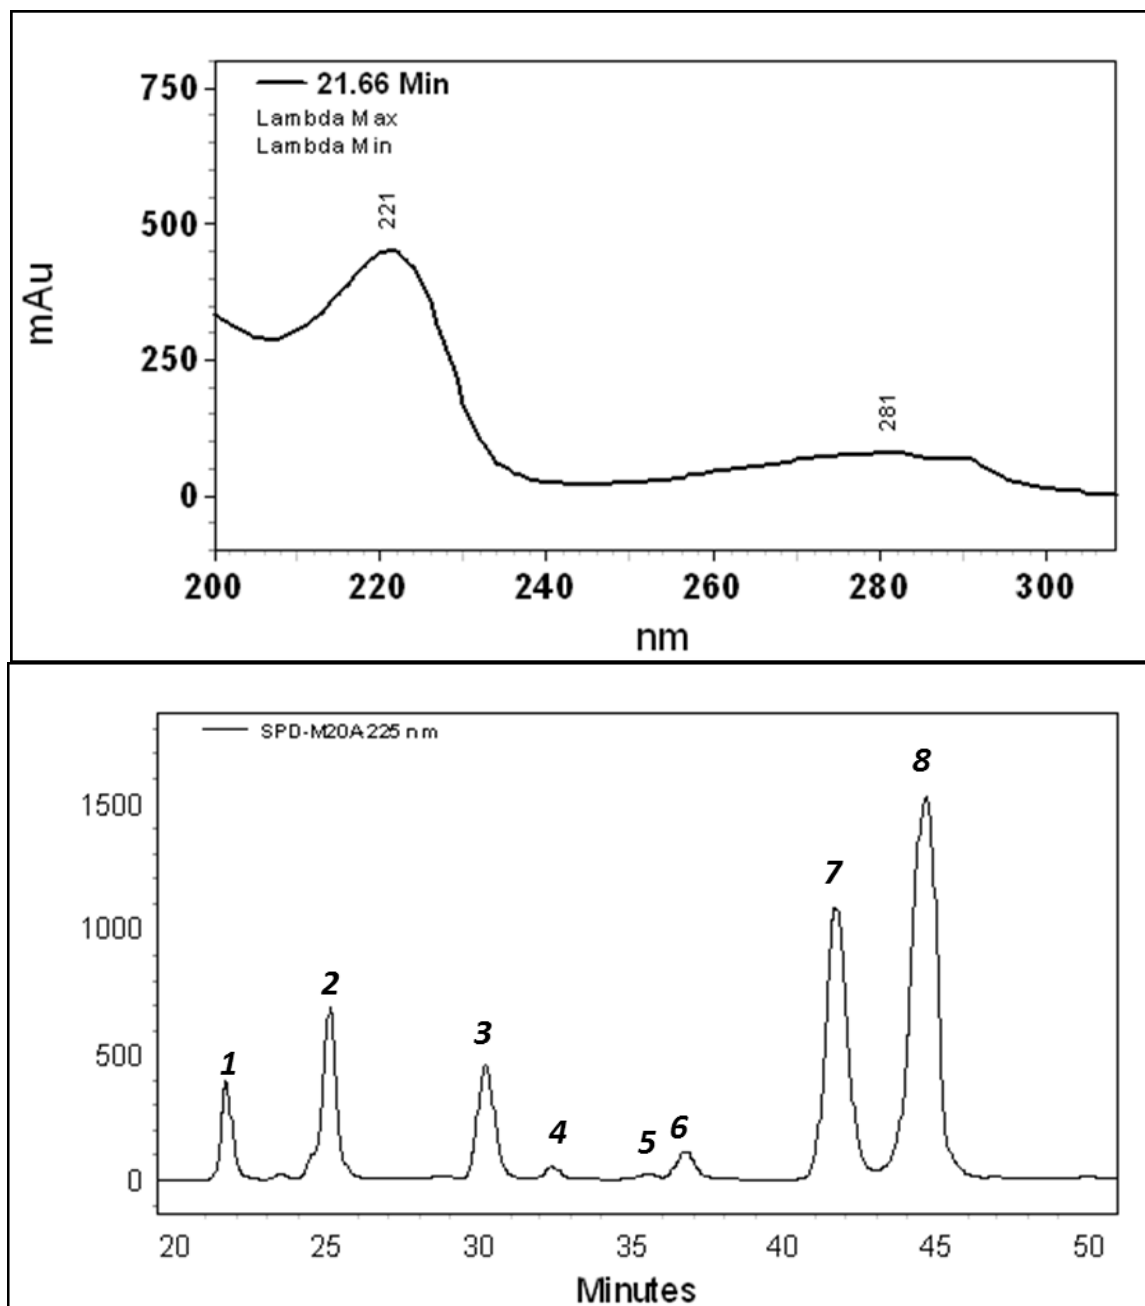

**Figure S4.** Teratogenicity of **1** tested at 5  $\mu\text{g/mL}$  (1a–c) and 10  $\mu\text{g/mL}$  (2a–c) in zebrafish embryos exposed until 5 dpf. For reference, an untreated control embryo at 5 dpf is shown (**d**); Notable effects on development at both concentrations include (**a**) overall lack of pigmentations, *i.e.*, melanophores; (**b**) curvature of body axis; and (**c**) pericardial edema.

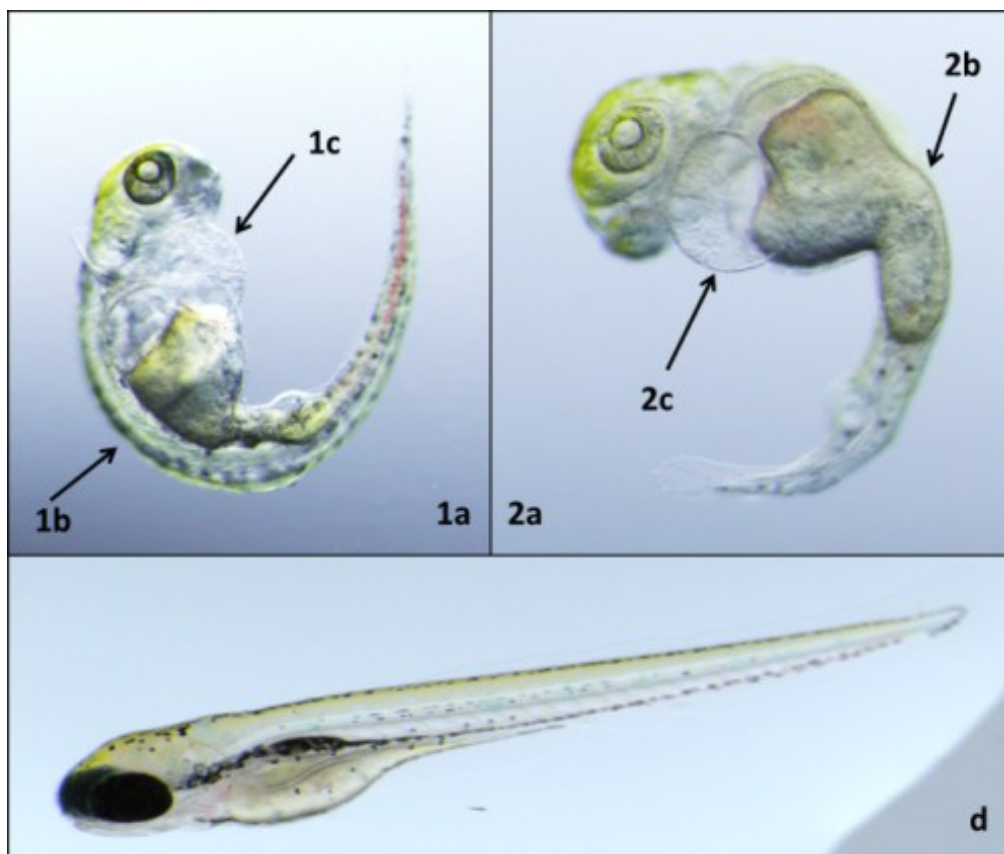

**Figure S5.** Teratogenicity of **2** tested at 10  $\mu\text{g/mL}$  (**a**) in zebrafish embryos exposed until 5 dpf. For reference, an untreated control embryo at 5 dpf is shown (**b**).

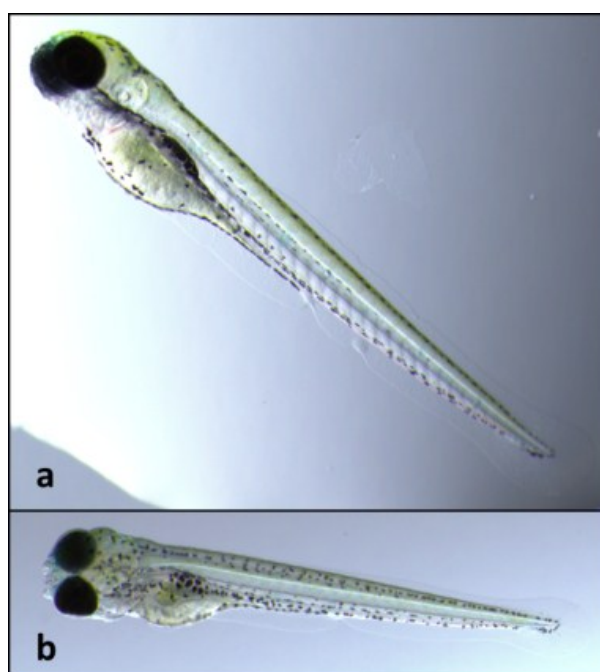

**Figure S6.** Key HMBC (arrows) and COSY (bold line) correlations for 12-*epi*-hapalindole H isonitrile (**1**).

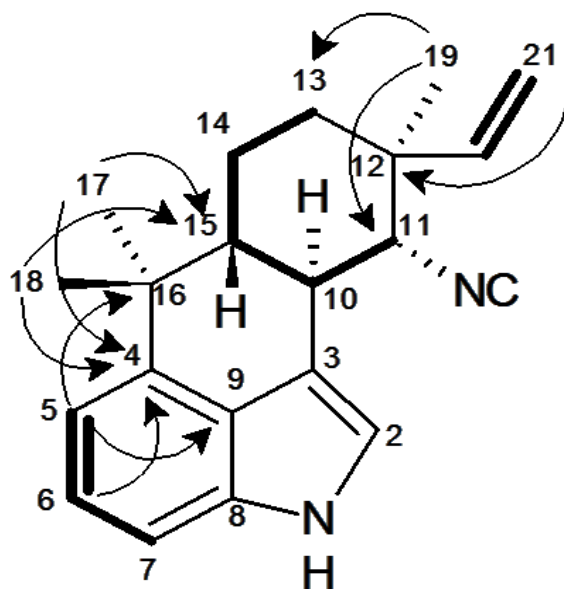

Supplement: s1 [file s1]
